# Supplementary material for: Effect of sulfur on pollen germination of Clemenules mandarin and Nova tangelo
Source: PeerJ. 2023 Feb 7;11:e14775. doi: 10.7717/peerj.14775 (PMC9912945; doi:10.7717/peerj.14775)
Supplement: Supplemental Information 2 — Treatments: PAP (IS), inorganic sulfur; PAWG (GS), water dispersable granbular sulfur; PANH (NS), ammonium sulfate; PACU (CS), copper sulfate; BK, standard germination medium (positive control) [file peerj-11-14775-s002.xlsx]

## Sheet: DATA
Species	Variety	Plate	Treatment	Concentration	Repetitito	pH	Npollen	Ngerminated	Lpolen24	Length24	Lpolen48	Length48	Lpolen72	Length72	Date	Observations
																PRIMERA REPETICIÓN NOVA
Citrus reticulata x sinensis	Nova	PAP_2000_1a	PAP	2000	1a	4.23	37	0	5	3.6	5	3	1	5	2018-01-12
Citrus reticulata x sinensis	Nova	PAP_2000_2a	PAP	2000	2a	4.23	45	1	2	3	1	5	3	5	2018-01-12
Citrus reticulata x sinensis	Nova	PAP_2000_3a	PAP	2000	3a	4.23	16	0	1	3	3	4	1	3	2018-01-12
Citrus reticulata x sinensis	Nova	PAP_2000_4a	PAP	2000	4a	4.23	53	0			5	3.6	5	3.6	2018-01-12
Citrus reticulata x sinensis	Nova	PAP_2000_5a	PAP	2000	5a	4.23	26	0			5	4	5	4	2018-01-12
Citrus reticulata x sinensis	Nova	PAP_200_1a	PAP	200	1a	3.79	5	0	10	2.6	10	4.6	3	4	2018-01-12
Citrus reticulata x sinensis	Nova	PAP_200_2a	PAP	200	2a	3.79	6	0	10	2.9	10	4	5	3.6	2018-01-12
Citrus reticulata x sinensis	Nova	PAP_200_3a	PAP	200	3a	3.79	21	0	10	3.1	10	3.2	10	4.4	2018-01-12
Citrus reticulata x sinensis	Nova	PAP_200_4a	PAP	200	4a	3.79	9	0	10	3.1	10	3.5	5	4.4	2018-01-12
Citrus reticulata x sinensis	Nova	PAP_200_5a	PAP	200	5a	3.79	9	0	5	2.2	10	4.2	7	3.14	2018-01-12
Citrus reticulata x sinensis	Nova	PAP_20_1a	PAP	20	1a	3.69	5	0	10	3.1	5	3.8	5	4.4	2018-01-12
Citrus reticulata x sinensis	Nova	PAP_20_2a	PAP	20	2a	3.69	6	2	10	3.1	10	5.1	2	5.5	2018-01-12
Citrus reticulata x sinensis	Nova	PAP_20_3a	PAP	20	3a	3.69	43	13	3	2	10	3.9	2	4	2018-01-12
Citrus reticulata x sinensis	Nova	PAP_20_4a	PAP	20	4a	3.69	6	0	5	4.2	7	4.16	5	4.8	2018-01-12
Citrus reticulata x sinensis	Nova	PAP_20_5a	PAP	20	5a	3.69	15	4	10	2.7	10	4.2	10	5.4	2018-01-12
Citrus reticulata x sinensis	Nova	PAP_2_1a	PAP	2	1a	3.72	22	9	10	3.4	10	3.3	5	3.4	2018-01-12
Citrus reticulata x sinensis	Nova	PAP_2_2a	PAP	2	2a	3.72	38	16	10	3.1	5	402	5	5	2018-01-12
Citrus reticulata x sinensis	Nova	PAP_2_3a	PAP	2	3a	3.72	26	9	10	3.1	5	3.8	2	3.5	2018-01-12
Citrus reticulata x sinensis	Nova	PAP_2_4a	PAP	2	4a	3.72	40	18	10	3.1	5	5	2	3.5	2018-01-12
Citrus reticulata x sinensis	Nova	PAP_2_5a	PAP	2	5a	3.72	36	17	5	3.6	5	3.16	5	4.5	2018-01-12
Citrus reticulata x sinensis	Nova	PAP_0,2_1a	PAP	0.2	1a	4.32	26	15	10	4.5	5	3.6	5	4.2	2018-01-12
Citrus reticulata x sinensis	Nova	PAP_0,2_2a	PAP	0.2	2a	4.32	21	10	10	3	5	3.4	5	4	2018-01-12
Citrus reticulata x sinensis	Nova	PAP_0,2_3a	PAP	0.2	3a	4.32	29	16	10	3.9	3	4	5	3.8	2018-01-12
Citrus reticulata x sinensis	Nova	PAP_0,2_4a	PAP	0.2	4a	4.32	43	24	10	3.8	3	4	2	4	2018-01-12
Citrus reticulata x sinensis	Nova	PAP_0,2_5a	PAP	0.2	5a	4.32	28	16	5	3	5	3.8	5	4.8	2018-01-12
Citrus reticulata x sinensis	Nova	PAWG_2000_1a	PAWG	2000	1a	4.49	56	0	5	3.2	5	3.2	2	3	2018-01-12
Citrus reticulata x sinensis	Nova	PAWG_2000_2a	PAWG	2000	2a	4.49	87	1	10	4.1	5	3.6	5	4.6	2018-01-12
Citrus reticulata x sinensis	Nova	PAWG_2000_3a	PAWG	2000	3a	4.49	54	0	5	4.2	5	4.4	2	4.5	2018-01-12
Citrus reticulata x sinensis	Nova	PAWG_2000_4a	PAWG	2000	4a	4.49	110	1	10	4.3	3	4.66	3	4.67	2018-01-12
Citrus reticulata x sinensis	Nova	PAWG_2000_5a	PAWG	2000	5a	4.49	98	0	6	3.8	10	5.2	5	4.8	2018-01-12
Citrus reticulata x sinensis	Nova	PAWG_200_1a	PAWG	200	1a	3.76	27	0	5	3.1	10	2.15	10	2.95	2018-01-12
Citrus reticulata x sinensis	Nova	PAWG_200_2a	PAWG	200	2a	3.76	56	3	7	3.66	10	2.75	7	2.57	2018-01-12
Citrus reticulata x sinensis	Nova	PAWG_200_3a	PAWG	200	3a	3.76	76	0	1	1	3	1.25	8	2.37	2018-01-12
Citrus reticulata x sinensis	Nova	PAWG_200_4a	PAWG	200	4a	3.76	79	0			4	2.5	10	3.05	2018-01-12
Citrus reticulata x sinensis	Nova	PAWG_200_5a	PAWG	200	5a	3.76	156	5			10	4.2	10	2.55	2018-01-12
Citrus reticulata x sinensis	Nova	PAWG_20_1a	PAWG	20	1a	3.7	49	6	2	3	10	2.5	10	2.65	2018-01-12
Citrus reticulata x sinensis	Nova	PAWG_20_2a	PAWG	20	2a	3.7	98	8	3	4	10	2.35	10	3.25	2018-01-12
Citrus reticulata x sinensis	Nova	PAWG_20_3a	PAWG	20	3a	3.7	40	5			8	3.6	5	2.6	2018-01-12
Citrus reticulata x sinensis	Nova	PAWG_20_4a	PAWG	20	4a	3.7	81	13			8	2.69	10	2.95	2018-01-12
Citrus reticulata x sinensis	Nova	PAWG_20_5a	PAWG	20	5a	3.7	83	11			7	1.8	10	2.6	2018-01-12
Citrus reticulata x sinensis	Nova	PAWG_2_1a	PAWG	2	1a	4.21	31	11	5	2.4	6	4.83	10	6	2018-01-12
Citrus reticulata x sinensis	Nova	PAWG_2_2a	PAWG	2	2a	4.21	27	9	5	2.3	8	1.25	10	5.2	2018-01-12
Citrus reticulata x sinensis	Nova	PAWG_2_3a	PAWG	2	3a	4.21	31	10	1	3	10	3.9	10	5.4	2018-01-12
Citrus reticulata x sinensis	Nova	PAWG_2_4a	PAWG	2	4a	4.21	52	26	1	2	10	1.6	10	5.1	2018-01-12
Citrus reticulata x sinensis	Nova	PAWG_2_5a	PAWG	2	5a	4.21	42	16			10	2.85	10	4.7	2018-01-12
Citrus reticulata x sinensis	Nova	PAWG_0,2_1a	PAWG	0.2	1a	5.11	30	13	4	2.5	1	1	10	4.8	2018-01-12
Citrus reticulata x sinensis	Nova	PAWG_0,2_2a	PAWG	0.2	2a	5.11	39	18	10	4.7	10	3.25	10	6.2	2018-01-12
Citrus reticulata x sinensis	Nova	PAWG_0,2_3a	PAWG	0.2	3a	5.11	13	6	10	4.9	10	2.7	10	5.9	2018-01-12
Citrus reticulata x sinensis	Nova	PAWG_0,2_4a	PAWG	0.2	4a	5.11	32	13	10	3.3	10	3.75	10	5.1	2018-01-12
Citrus reticulata x sinensis	Nova	PAWG_0,2_5a	PAWG	0.2	5a	5.11	17	5			10	3.35	10	4.7	2018-01-12
Citrus reticulata x sinensis	Nova	PANH_2000_1a	PANH	2000	1a	4.28	24	0	10	3.5	10	5.2	5	4	2018-01-12
Citrus reticulata x sinensis	Nova	PANH_2000_2a	PANH	2000	2a	4.28	39	0	10	3.4	10	4.1	10	5.3	2018-01-12
Citrus reticulata x sinensis	Nova	PANH_2000_3a	PANH	2000	3a	4.28	20	0	10	3.3	10	4.2	5	5.4	2018-01-12
Citrus reticulata x sinensis	Nova	PANH_2000_4a	PANH	2000	4a	4.28	30	1	10	3.5	10	5.2	10	4	2018-01-12
Citrus reticulata x sinensis	Nova	PANH_2000_5a	PANH	2000	5a	4.28	53	1	10	3.3	5	4.8	5	4.4	2018-01-12
Citrus reticulata x sinensis	Nova	PANH_200_1a	PANH	200	1a	5.53	29	2	10	3	10	4.9	10	4.3	2018-01-12
Citrus reticulata x sinensis	Nova	PANH_200_2a	PANH	200	2a	5.53	51	3	10	3.7	5	5.6	10	5	2018-01-12
Citrus reticulata x sinensis	Nova	PANH_200_3a	PANH	200	3a	5.53	34	1	10	3.2	10	5.9	10	5.4	2018-01-12
Citrus reticulata x sinensis	Nova	PANH_200_4a	PANH	200	4a	5.53	74	3	10	3.3	10	4.8	10	4	2018-01-12
Citrus reticulata x sinensis	Nova	PANH_200_5a	PANH	200	5a	5.53	40	0	10	2.6	10	4.3	10	3.9	2018-01-12
Citrus reticulata x sinensis	Nova	PANH_20_1a	PANH	20	1a	5.95	14	5	10	4.2	5	4.2	10	4.7	2018-01-12
Citrus reticulata x sinensis	Nova	PANH_20_2a	PANH	20	2a	5.95	19	6	10	3.6	5	4	10	5.4	2018-01-12
Citrus reticulata x sinensis	Nova	PANH_20_3a	PANH	20	3a	5.95	24	9	1	2	5	4.6	10	4.9	2018-01-12
Citrus reticulata x sinensis	Nova	PANH_20_4a	PANH	20	4a	5.95	24	9	10	3.7	10	5.1	10	5.6	2018-01-12
Citrus reticulata x sinensis	Nova	PANH_20_5a	PANH	20	5a	5.95	31	13	5	3	10	5.9	2	3	2018-01-12
Citrus reticulata x sinensis	Nova	PANH_2_1a	PANH	2	1a	5.98	11	6	5	2.8	5	5.4	10	5.2	2018-01-12
Citrus reticulata x sinensis	Nova	PANH_2_2a	PANH	2	2a	5.98	23	10	5	2.6	4	4.5	10	5.2	2018-01-12
Citrus reticulata x sinensis	Nova	PANH_2_3a	PANH	2	3a	5.98	18	8	5	2.6	10	3.8	10	5.8	2018-01-12
Citrus reticulata x sinensis	Nova	PANH_2_4a	PANH	2	4a	5.98	32	15	10	4.5	10	4.5	10	5.7	2018-01-12
Citrus reticulata x sinensis	Nova	PANH_2_5a	PANH	2	5a	5.98	21	14	10	3.1	2	4	10	5.1	2018-01-12
Citrus reticulata x sinensis	Nova	PANH_0,2_1a	PANH	0.2	1a	4.1	25	12	4	2.66	3	3.33	2	2	2018-01-12
Citrus reticulata x sinensis	Nova	PANH_0,2_2a	PANH	0.2	2a	4.1	10	5	2	2	5	3	2	5	2018-01-12
Citrus reticulata x sinensis	Nova	PANH_0,2_3a	PANH	0.2	3a	4.1	14	6	5	3	10	4.3	2	3.5	2018-01-12
Citrus reticulata x sinensis	Nova	PANH_0,2_4a	PANH	0.2	4a	4.1	20	9	10	3.6	10	3.7	10	3.8	2018-01-12
Citrus reticulata x sinensis	Nova	PANH_0,2_5a	PANH	0.2	5a	4.1	16	8	3	3.33	5	3.4	5	5.2	2018-01-12
Citrus reticulata x sinensis	Nova	PACU_2000_1a	PACU	2000	1a	1.53	43	0	1	4	5	3	4	3	2018-01-12
Citrus reticulata x sinensis	Nova	PACU_2000_2a	PACU	2000	2a	1.53	44	2	3	3.66	3	4	5	4.6	2018-01-12
Citrus reticulata x sinensis	Nova	PACU_2000_3a	PACU	2000	3a	1.53	24	0	5	3.6	2	3.5	2	4	2018-01-12
Citrus reticulata x sinensis	Nova	PACU_2000_4a	PACU	2000	4a	1.53	66	0	1	3	5	4	8	3.25	2018-01-12
Citrus reticulata x sinensis	Nova	PACU_2000_5a	PACU	2000	5a	1.53	89	2	1	3	5	3.6	10	4	2018-01-12
Citrus reticulata x sinensis	Nova	PACU_200_1a	PACU	200	1a	2.95	47	4	3	3	2	2.5	2	3	2018-01-12
Citrus reticulata x sinensis	Nova	PACU_200_2a	PACU	200	2a	2.95	42	5	2	3.5	5	3.4	2	3	2018-01-12
Citrus reticulata x sinensis	Nova	PACU_200_3a	PACU	200	3a	2.95	20	2	5	3	5	2.6	3	3	2018-01-12
Citrus reticulata x sinensis	Nova	PACU_200_4a	PACU	200	4a	2.95	69	5	1	3	2	3.5	3	4.33	2018-01-12
Citrus reticulata x sinensis	Nova	PACU_200_5a	PACU	200	5a	2.95	17	0	3	3.66	2	3.5	2	2	2018-01-12
Citrus reticulata x sinensis	Nova	PACU_20_1a	PACU	20	1a	3.46	18	3	2	2.5	4	3.75	3	2.5	2018-01-12
Citrus reticulata x sinensis	Nova	PACU_20_2a	PACU	20	2a	3.46	27	5	3	2.5	10	3.7	2	2	2018-01-12
Citrus reticulata x sinensis	Nova	PACU_20_3a	PACU	20	3a	3.46	31	7	2	2.25	1	4			2018-01-12
Citrus reticulata x sinensis	Nova	PACU_20_4a	PACU	20	4a	3.46	41	8	1	2.5	2	4.5			2018-01-12
Citrus reticulata x sinensis	Nova	PACU_20_5a	PACU	20	5a	3.46	38	9			5	4			2018-01-12
Citrus reticulata x sinensis	Nova	PACU_2_1a	PACU	2	1a	3.95	17	7	10	3.3	10	4.8	10	3.35	2018-01-12
Citrus reticulata x sinensis	Nova	PACU_2_2a	PACU	2	2a	3.95	21	8	10	3.2	10	3.8	10	2.85	2018-01-12
Citrus reticulata x sinensis	Nova	PACU_2_3a	PACU	2	3a	3.95	24	9	10	3.2	10	5	3	5	2018-01-12
Citrus reticulata x sinensis	Nova	PACU_2_4a	PACU	2	4a	3.95	40	17							2018-01-12
Citrus reticulata x sinensis	Nova	PACU_2_5a	PACU	2	5a	3.95	63	28							2018-01-12
Citrus reticulata x sinensis	Nova	PACU_0,2_1a	PACU	0.2	1a	4.44	11	6	10	4	2	1.5	10	3.5	2018-01-12
Citrus reticulata x sinensis	Nova	PACU_0,2_2a	PACU	0.2	2a	4.44	23	10	10	3.8	2	2	10	3.9	2018-01-12
Citrus reticulata x sinensis	Nova	PACU_0,2_3a	PACU	0.2	3a	4.44	28	16	10	4	2	3.5	10	2.75	2018-01-12
Citrus reticulata x sinensis	Nova	PACU_0,2_4a	PACU	0.2	4a	4.44	31	20	10	3.2	1	1	10	2.15	2018-01-12
Citrus reticulata x sinensis	Nova	PACU_0,2_5a	PACU	0.2	5a	4.44	13	6	10	3.9					2018-01-12
Citrus reticulata x sinensis	Nova	Control 1a	BK	0	1a	5.4	23	15	10	2.8	10	6.1	10	5.8	2018-01-12
Citrus reticulata x sinensis	Nova	Control 2a	BK	0	2a	5.4	25	14	10	3.4	10	6.2	10	5.1	2018-01-12
Citrus reticulata x sinensis	Nova	Control 3a	BK	0	3a	5.4	17	10	10	3.9	10	6.2	10	4.8	2018-01-12
Citrus reticulata x sinensis	Nova	Control 4a	BK	0	4a	5.4	30	22	10	2.7	10	4.6	10	7	2018-01-12
Citrus reticulata x sinensis	Nova	Control 5a	BK	0	5a	5.4	8	4	10	3	10	4.6	10	5.6	2018-01-12
Citrus reticulata x sinensis	Nova	Control+Tween 1a	BK	0	1a		46	1							2018-01-12
Citrus reticulata x sinensis	Nova	Control+Tween 2a	BK	0	2a		51	1							2018-01-12
Citrus reticulata x sinensis	Nova	Control+Tween 3a	BK	0	3a		60	0							2018-01-12
Citrus reticulata x sinensis	Nova	Control+Tween 4a	BK	0	4a		63	1							2018-01-12
Citrus reticulata x sinensis	Nova	Control+Tween 5a	BK	0	5a		29	1							2018-01-12
																PRIMERA REPETICIÓN CLEMENULES
Citrus reticulata	Clemenules	PAP_2000_1a	PAP	2000	1a	4.23	15	0				2.7		3	2018-01-25
Citrus reticulata	Clemenules	PAP_2000_2a	PAP	2000	2a	4.23	43	0				1		3	2018-01-25
Citrus reticulata	Clemenules	PAP_2000_3a	PAP	2000	3a	4.23	31	0				3.12		3.6	2018-01-25
Citrus reticulata	Clemenules	PAP_2000_4a	PAP	2000	4a	4.23	24	0				3.25		3.4	2018-01-25
Citrus reticulata	Clemenules	PAP_2000_5a	PAP	2000	5a	4.23	17	0				1		4	2018-01-25
Citrus reticulata	Clemenules	PAP_200_1a	PAP	200	1a	3.79	8	0				2		3	2018-01-25
Citrus reticulata	Clemenules	PAP_200_2a	PAP	200	2a	3.79	16	0				2.81		2.5	2018-01-25
Citrus reticulata	Clemenules	PAP_200_3a	PAP	200	3a	3.79	26	0				2.75		3.5	2018-01-25
Citrus reticulata	Clemenules	PAP_200_4a	PAP	200	4a	3.79	23	0						3.33	2018-01-25
Citrus reticulata	Clemenules	PAP_200_5a	PAP	200	5a	3.79	6	0						2.8	2018-01-25
Citrus reticulata	Clemenules	PAP_20_1a	PAP	20	1a	3.69	6	0				2.31		2.33	2018-01-25
Citrus reticulata	Clemenules	PAP_20_2a	PAP	20	2a	3.69	8	1				2.7		3	2018-01-25
Citrus reticulata	Clemenules	PAP_20_3a	PAP	20	3a	3.69	9	2				2.2		2.25	2018-01-25
Citrus reticulata	Clemenules	PAP_20_4a	PAP	20	4a	3.69	13	3				2.75		2.16	2018-01-25
Citrus reticulata	Clemenules	PAP_20_5a	PAP	20	5a	3.69	12	4				2.6		2.5	2018-01-25
Citrus reticulata	Clemenules	PAP_2_1a	PAP	2	1a	3.72	7	4				2		3.5	2018-01-25
Citrus reticulata	Clemenules	PAP_2_2a	PAP	2	2a	3.72	18	10				4		3.5	2018-01-25
Citrus reticulata	Clemenules	PAP_2_3a	PAP	2	3a	3.72	14	6				1.75		3	2018-01-25
Citrus reticulata	Clemenules	PAP_2_4a	PAP	2	4a	3.72	8	3						3	2018-01-25
Citrus reticulata	Clemenules	PAP_2_5a	PAP	2	5a	3.72	4	2						3	2018-01-25
Citrus reticulata	Clemenules	PAP_0,2_1a	PAP	0.2	1a	4.32	10	5				2.43		2.5	2018-01-25
Citrus reticulata	Clemenules	PAP_0,2_2a	PAP	0.2	2a	4.32	20	11				1.43		3.5	2018-01-25
Citrus reticulata	Clemenules	PAP_0,2_3a	PAP	0.2	3a	4.32	9	6				1.9		3	2018-01-25
Citrus reticulata	Clemenules	PAP_0,2_4a	PAP	0.2	4a	4.32	17	12				1		3.33	2018-01-25
Citrus reticulata	Clemenules	PAP_0,2_5a	PAP	0.2	5a	4.32						2.64		2	2018-01-25
Citrus reticulata	Clemenules	PAWG_2000_1a	PAWG	2000	1a	4.49	11	1				2.27		4.1	2018-01-25
Citrus reticulata	Clemenules	PAWG_2000_2a	PAWG	2000	2a	4.49	24	0				1.9		2.8	2018-01-25
Citrus reticulata	Clemenules	PAWG_2000_3a	PAWG	2000	3a	4.49	25	0				3.05		3.3	2018-01-25
Citrus reticulata	Clemenules	PAWG_2000_4a	PAWG	2000	4a	4.49	21	0				2		3.6	2018-01-25
Citrus reticulata	Clemenules	PAWG_2000_5a	PAWG	2000	5a	4.49	18	0				2.85		3.9	2018-01-25
Citrus reticulata	Clemenules	PAWG_200_1a	PAWG	200	1a	3.76	45	0				2.55		2.7	2018-01-25
Citrus reticulata	Clemenules	PAWG_200_2a	PAWG	200	2a	3.76	41	0				2.3		3.5	2018-01-25
Citrus reticulata	Clemenules	PAWG_200_3a	PAWG	200	3a	3.76	8	0				2.3		3.7	2018-01-25
Citrus reticulata	Clemenules	PAWG_200_4a	PAWG	200	4a	3.76	24	0				2.8		2.7	2018-01-25
Citrus reticulata	Clemenules	PAWG_200_5a	PAWG	200	5a	3.76	44	0				2.05		3.8	2018-01-25
Citrus reticulata	Clemenules	PAWG_20_1a	PAWG	20	1a	3.7	26	6				2.62		4.1	2018-01-25
Citrus reticulata	Clemenules	PAWG_20_2a	PAWG	20	2a	3.7	22	8				1.95		3	2018-01-25
Citrus reticulata	Clemenules	PAWG_20_3a	PAWG	20	3a	3.7	17	6				1.33		3	2018-01-25
Citrus reticulata	Clemenules	PAWG_20_4a	PAWG	20	4a	3.7	25	5				2.25		4.1	2018-01-25
Citrus reticulata	Clemenules	PAWG_20_5a	PAWG	20	5a	3.7	27	7				2.95		3.1	2018-01-25
Citrus reticulata	Clemenules	PAWG_2_1a	PAWG	2	1a	4.21	4	2				2.35		3.2	2018-01-25
Citrus reticulata	Clemenules	PAWG_2_2a	PAWG	2	2a	4.21	4	2				1.6		3	2018-01-25
Citrus reticulata	Clemenules	PAWG_2_3a	PAWG	2	3a	4.21	21	10				2.9		3.6	2018-01-25
Citrus reticulata	Clemenules	PAWG_2_4a	PAWG	2	4a	4.21	5	2				2.6		4	2018-01-25
Citrus reticulata	Clemenules	PAWG_2_5a	PAWG	2	5a	4.21	18	9				2.15		2.9	2018-01-25
Citrus reticulata	Clemenules	PAWG_0,2_1a	PAWG	0.2	1a	5.11	13	3				2.5		3.6	2018-01-25
Citrus reticulata	Clemenules	PAWG_0,2_2a	PAWG	0.2	2a	5.11	27	13				1.5		3.8	2018-01-25
Citrus reticulata	Clemenules	PAWG_0,2_3a	PAWG	0.2	3a	5.11	6	4				3.14		4	2018-01-25
Citrus reticulata	Clemenules	PAWG_0,2_4a	PAWG	0.2	4a	5.11	10	6				2.15		3	2018-01-25
Citrus reticulata	Clemenules	PAWG_0,2_5a	PAWG	0.2	5a	5.11	20	8				2.15		3.4	2018-01-25
Citrus reticulata	Clemenules	PANH_2000_1a	PANH	2000	1a	4.28	25	0	10	3.4		2.75		3.4	2018-01-25
Citrus reticulata	Clemenules	PANH_2000_2a	PANH	2000	2a	4.28	45	1	10	2.15		3		3.5	2018-01-25
Citrus reticulata	Clemenules	PANH_2000_3a	PANH	2000	3a	4.28	10	0	10	2.7		4.71		4.4	2018-01-25
Citrus reticulata	Clemenules	PANH_2000_4a	PANH	2000	4a	4.28	39	0	10	2.85		5.17		3.4	2018-01-25
Citrus reticulata	Clemenules	PANH_2000_5a	PANH	2000	5a	4.28	31	0	10	2.15		3.43		4.6	2018-01-25
Citrus reticulata	Clemenules	PANH_200_1a	PANH	200	1a	5.53	14	1	10	2.35		3.87		4.1	2018-01-25
Citrus reticulata	Clemenules	PANH_200_2a	PANH	200	2a	5.53	20	2	10	2.53		4.1		4.4	2018-01-25
Citrus reticulata	Clemenules	PANH_200_3a	PANH	200	3a	5.53	19	0	10	2.7		4.1		4.5	2018-01-25
Citrus reticulata	Clemenules	PANH_200_4a	PANH	200	4a	5.53	26	0	10	3.45		3.4		4.5	2018-01-25
Citrus reticulata	Clemenules	PANH_200_5a	PANH	200	5a	5.53	27	2	10	3.15		3		3.8	2018-01-25
Citrus reticulata	Clemenules	PANH_20_1a	PANH	20	1a	5.95	9	4	10	3.3		2.45		4.2	2018-01-25
Citrus reticulata	Clemenules	PANH_20_2a	PANH	20	2a	5.95	42	19	10	3.05		2.7		4.3	2018-01-25
Citrus reticulata	Clemenules	PANH_20_3a	PANH	20	3a	5.95	21	9	10	2.8		3.7		3.6	2018-01-25
Citrus reticulata	Clemenules	PANH_20_4a	PANH	20	4a	5.95	22	6	10	3.15		2.9		3.6	2018-01-25
Citrus reticulata	Clemenules	PANH_20_5a	PANH	20	5a	5.95	23	12	10	2.25		2.35		4.1	2018-01-25
Citrus reticulata	Clemenules	PANH_2_1a	PANH	2	1a	5.98	10	4	10	2.45		3		3	2018-01-25
Citrus reticulata	Clemenules	PANH_2_2a	PANH	2	2a	5.98	9	4	10	2.35		2.5		4.3	2018-01-25
Citrus reticulata	Clemenules	PANH_2_3a	PANH	2	3a	5.98	23	13	10	3.05		2.3		4.2	2018-01-25
Citrus reticulata	Clemenules	PANH_2_4a	PANH	2	4a	5.98	21	10	10	2.9		3.5		3.6	2018-01-25
Citrus reticulata	Clemenules	PANH_2_5a	PANH	2	5a	5.98	11	4	10	2.1		3		3.8	2018-01-25
Citrus reticulata	Clemenules	PANH_0,2_1a	PANH	0.2	1a	4.1	8	4	10	2.9		3.1		4.2	2018-01-25
Citrus reticulata	Clemenules	PANH_0,2_2a	PANH	0.2	2a	4.1	15	7	10	2.35		4.4		4.4	2018-01-25
Citrus reticulata	Clemenules	PANH_0,2_3a	PANH	0.2	3a	4.1	14	8	10	2.42		3.5		4.6	2018-01-25
Citrus reticulata	Clemenules	PANH_0,2_4a	PANH	0.2	4a	4.1	10	5	10	2.5		4		4.7	2018-01-25
Citrus reticulata	Clemenules	PANH_0,2_5a	PANH	0.2	5a	4.1	10	6	10	4.15		3.2		4.2	2018-01-25
Citrus reticulata	Clemenules	PACU_2000_1a	PACU	2000	1a	1.53	13	0	3	1	2	4.5		1.57	2018-01-25
Citrus reticulata	Clemenules	PACU_2000_2a	PACU	2000	2a	1.53	37	0	10	1.85	5	3.6		1.66	2018-01-25
Citrus reticulata	Clemenules	PACU_2000_3a	PACU	2000	3a	1.53	20	0	10	2.75	3	2.67		1.6	2018-01-25
Citrus reticulata	Clemenules	PACU_2000_4a	PACU	2000	4a	1.53	36	0	7	1.78	5	3.2		2.33	2018-01-25
Citrus reticulata	Clemenules	PACU_2000_5a	PACU	2000	5a	1.53	47	0	10	3	5	3.6		2.66	2018-01-25
Citrus reticulata	Clemenules	PACU_200_1a	PACU	200	1a	2.95	8	1	10	2.72		3.6		2.25	2018-01-25
Citrus reticulata	Clemenules	PACU_200_2a	PACU	200	2a	2.95	16	0	10	2.65		2.7		1.33	2018-01-25
Citrus reticulata	Clemenules	PACU_200_3a	PACU	200	3a	2.95	22	1	10	3.05		2.5		2.87	2018-01-25
Citrus reticulata	Clemenules	PACU_200_4a	PACU	200	4a	2.95	47	0	8	2		3.5		1.33	2018-01-25
Citrus reticulata	Clemenules	PACU_200_5a	PACU	200	5a	2.95	38	0	10	2.8		3		2	2018-01-25
Citrus reticulata	Clemenules	PACU_20_1a	PACU	20	1a	3.46	6	0	10	3.3		3		2.12	2018-01-25
Citrus reticulata	Clemenules	PACU_20_2a	PACU	20	2a	3.46	8	2	10	3.1		1.33		1.25	2018-01-25
Citrus reticulata	Clemenules	PACU_20_3a	PACU	20	3a	3.46	14	3	10	2.55		2.5		2	2018-01-25
Citrus reticulata	Clemenules	PACU_20_4a	PACU	20	4a	3.46	6	2	10	2.55				2	2018-01-25
Citrus reticulata	Clemenules	PACU_20_5a	PACU	20	5a	3.46	10	3	10	2.25					2018-01-25
Citrus reticulata	Clemenules	PACU_2_1a	PACU	2	1a	3.95	10	2	10	1.65		1.67		1.65	2018-01-25
Citrus reticulata	Clemenules	PACU_2_2a	PACU	2	2a	3.95	6	3	10	2		3.6		1.9	2018-01-25
Citrus reticulata	Clemenules	PACU_2_3a	PACU	2	3a	3.95	16	7	10	2.15		2.22		2.85	2018-01-25
Citrus reticulata	Clemenules	PACU_2_4a	PACU	2	4a	3.95	9	4	10	2.4		3.67		2.05	2018-01-25
Citrus reticulata	Clemenules	PACU_2_5a	PACU	2	5a	3.95	4	2	10	2.1		2.14		2.8	2018-01-25
Citrus reticulata	Clemenules	PACU_0,2_1a	PACU	0.2	1a	4.44	6	3	10	3.3		3		2.12	2018-01-25
Citrus reticulata	Clemenules	PACU_0,2_2a	PACU	0.2	2a	4.44	11	5	3	1.66		1.71		2.75	2018-01-25
Citrus reticulata	Clemenules	PACU_0,2_3a	PACU	0.2	3a	4.44	5	2	10	2.42		2.5		2.25	2018-01-25
Citrus reticulata	Clemenules	PACU_0,2_4a	PACU	0.2	4a	4.44	22	8	10	1.85		3.28		2.25	2018-01-25
Citrus reticulata	Clemenules	PACU_0,2_5a	PACU	0.2	5a	4.44	6	4	10	2.61		2.75		1.12	2018-01-25
Citrus reticulata	Clemenules	Control 1a	BK	0	1a	5.4	12	7	10	2.3		4.9		2.3	2018-01-25
Citrus reticulata	Clemenules	Control 2a	BK	0	2a	5.4	20	9	10	3.15		4.4		2.45	2018-01-25
Citrus reticulata	Clemenules	Control 3a	BK	0	3a	5.4	16	8	10	2		4.9		3.25	2018-01-25
Citrus reticulata	Clemenules	Control 4a	BK	0	4a	5.4	14	5	10	2.75		3.8		2.6	2018-01-25
Citrus reticulata	Clemenules	Control 5a	BK	0	5a	5.4	25	11	10	2.5		4.3		2.5	2018-01-25
																SEGUNDA REPETICIÓN NOVA
Citrus reticulata x sinensis	Nova	PA_20000_1b	PA	20000	1b	4.23	11	0		2		1.5		1	2018-02-02
Citrus reticulata x sinensis	Nova	PA_20000_2b	PA	20000	2b	4.23	17	0		1.75				1.5	2018-02-02
Citrus reticulata x sinensis	Nova	PA_20000_3b	PA	20000	3b	4.23	23	0							2018-02-02
Citrus reticulata x sinensis	Nova	PA_20000_4b	PA	20000	4b	4.23	28	0							2018-02-02
Citrus reticulata x sinensis	Nova	PA_20000_5b	PA	20000	5b	4.23	18	0							2018-02-02
Citrus reticulata x sinensis	Nova	PA_2000_1b	PA	2000	1b	3.79	26	0		2		2		1.75	2018-02-02
Citrus reticulata x sinensis	Nova	PA_2000_2b	PA	2000	2b	3.79	18	0		2				1.5	2018-02-02
Citrus reticulata x sinensis	Nova	PA_2000_3b	PA	2000	3b	3.79	28	0						1	2018-02-02
Citrus reticulata x sinensis	Nova	PA_2000_4b	PA	2000	4b	3.79	42	0							2018-02-02
Citrus reticulata x sinensis	Nova	PA_2000_5b	PA	2000	5b	3.79	55	0							2018-02-02
Citrus reticulata x sinensis	Nova	PA_200_1b	PA	200	1b	3.69	10	0		2.5		1.5		1.33	2018-02-02
Citrus reticulata x sinensis	Nova	PA_200_2b	PA	200	2b	3.69	22	1						2	2018-02-02
Citrus reticulata x sinensis	Nova	PA_200_3b	PA	200	3b	3.69	41	1						2	2018-02-02
Citrus reticulata x sinensis	Nova	PA_200_4b	PA	200	4b	3.69	56	1							2018-02-02
Citrus reticulata x sinensis	Nova	PA_200_5b	PA	200	5b	3.69	40	2							2018-02-02
Citrus reticulata x sinensis	Nova	PA_20_1b	PA	20	1b	3.72	16	2		1.5		1		1.5	2018-02-02
Citrus reticulata x sinensis	Nova	PA_20_2b	PA	20	2b	3.72	15	2							2018-02-02
Citrus reticulata x sinensis	Nova	PA_20_3b	PA	20	3b	3.72	26	3							2018-02-02
Citrus reticulata x sinensis	Nova	PA_20_4b	PA	20	4b	3.72	21	2							2018-02-02
Citrus reticulata x sinensis	Nova	PA_20_5b	PA	20	5b	3.72	25	2							2018-02-02
Citrus reticulata x sinensis	Nova	PA_2_1b	PA	2	1b	4.32	6	2		2		2		2	2018-02-02
Citrus reticulata x sinensis	Nova	PA_2_2b	PA	2	2b	4.32	20	3				2			2018-02-02
Citrus reticulata x sinensis	Nova	PA_2_3b	PA	2	3b	4.32	10	2							2018-02-02
Citrus reticulata x sinensis	Nova	PA_2_4b	PA	2	4b	4.32	12	6							2018-02-02
Citrus reticulata x sinensis	Nova	PA_2_5b	PA	2	5b	4.32	9	2							2018-02-02
Citrus reticulata x sinensis	Nova	PAWG_20000_1b	PAWG	20000	1b	5.11	14	0		1.75		2		2	2018-02-02
Citrus reticulata x sinensis	Nova	PAWG_20000_2b	PAWG	20000	2b	5.11	20	0		2					2018-02-02
Citrus reticulata x sinensis	Nova	PAWG_20000_3b	PAWG	20000	3b	5.11	5	0		2					2018-02-02
Citrus reticulata x sinensis	Nova	PAWG_20000_4b	PAWG	20000	4b	5.11	12	0							2018-02-02
Citrus reticulata x sinensis	Nova	PAWG_20000_5b	PAWG	20000	5b	5.11	14	0							2018-02-02
Citrus reticulata x sinensis	Nova	PAWG_2000_1b	PAWG	2000	1b	4.49	14	0		1.83		2			2018-02-02
Citrus reticulata x sinensis	Nova	PAWG_2000_2b	PAWG	2000	2b	4.49	30	2		2					2018-02-02
Citrus reticulata x sinensis	Nova	PAWG_2000_3b	PAWG	2000	3b	4.49	54	2							2018-02-02
Citrus reticulata x sinensis	Nova	PAWG_2000_4b	PAWG	2000	4b	4.49	20	1							2018-02-02
Citrus reticulata x sinensis	Nova	PAWG_2000_5b	PAWG	2000	5b	4.49	32	0							2018-02-02
Citrus reticulata x sinensis	Nova	PAWG_200_1b	PAWG	200	1b	3.76	10	0		1.75		1.25		2	2018-02-02
Citrus reticulata x sinensis	Nova	PAWG_200_2b	PAWG	200	2b	3.76	32	2		1.5		1.5			2018-02-02
Citrus reticulata x sinensis	Nova	PAWG_200_3b	PAWG	200	3b	3.76	41	2		2.25					2018-02-02
Citrus reticulata x sinensis	Nova	PAWG_200_4b	PAWG	200	4b	3.76	40	2		3					2018-02-02
Citrus reticulata x sinensis	Nova	PAWG_200_5b	PAWG	200	5b	3.76	21	5		2					2018-02-02
Citrus reticulata x sinensis	Nova	PAWG_20_1b	PAWG	20	1b	3.7	10	3		1.5		1.75			2018-02-02
Citrus reticulata x sinensis	Nova	PAWG_20_2b	PAWG	20	2b	3.7	15	4		1.5		2			2018-02-02
Citrus reticulata x sinensis	Nova	PAWG_20_3b	PAWG	20	3b	3.7	25	5		2		2			2018-02-02
Citrus reticulata x sinensis	Nova	PAWG_20_4b	PAWG	20	4b	3.7	27	7				1			2018-02-02
Citrus reticulata x sinensis	Nova	PAWG_20_5b	PAWG	20	5b	3.7	24	6							2018-02-02
Citrus reticulata x sinensis	Nova	PAWG_2_1b	PAWG	2	1b	4.21	15	5		2		2			2018-02-02
Citrus reticulata x sinensis	Nova	PAWG_2_2b	PAWG	2	2b	4.21	20	8							2018-02-02
Citrus reticulata x sinensis	Nova	PAWG_2_3b	PAWG	2	3b	4.21	6	3							2018-02-02
Citrus reticulata x sinensis	Nova	PAWG_2_4b	PAWG	2	4b	4.21	9	4							2018-02-02
Citrus reticulata x sinensis	Nova	PAWG_2_5b	PAWG	2	5b	4.21	20	5							2018-02-02
Citrus reticulata x sinensis	Nova	PANH_20000_1b	PANH	20000	1b	4.1	12	0		3		2		2	2018-02-02
Citrus reticulata x sinensis	Nova	PANH_20000_2b	PANH	20000	2b	4.1	30	0		2				1	2018-02-02
Citrus reticulata x sinensis	Nova	PANH_20000_3b	PANH	20000	3b	4.1	26	0		1.75					2018-02-02
Citrus reticulata x sinensis	Nova	PANH_20000_4b	PANH	20000	4b	4.1	21	0		2					2018-02-02
Citrus reticulata x sinensis	Nova	PANH_20000_5b	PANH	20000	5b	4.1	32	0							2018-02-02
Citrus reticulata x sinensis	Nova	PANH_2000_1b	PANH	2000	1b	4.28	28	1		1.25		1		1	2018-02-02
Citrus reticulata x sinensis	Nova	PANH_2000_2b	PANH	2000	2b	4.28	16	0		1		2			2018-02-02
Citrus reticulata x sinensis	Nova	PANH_2000_3b	PANH	2000	3b	4.28	19	0							2018-02-02
Citrus reticulata x sinensis	Nova	PANH_2000_4b	PANH	2000	4b	4.28	34	0							2018-02-02
Citrus reticulata x sinensis	Nova	PANH_2000_5b	PANH	2000	5b	4.28	25	0							2018-02-02
Citrus reticulata x sinensis	Nova	PANH_200_1b	PANH	200	1b	5.53	19	3		2		1.5		1	2018-02-02
Citrus reticulata x sinensis	Nova	PANH_200_2b	PANH	200	2b	5.53	21	2		1.5				1	2018-02-02
Citrus reticulata x sinensis	Nova	PANH_200_3b	PANH	200	3b	5.53	12	0		2					2018-02-02
Citrus reticulata x sinensis	Nova	PANH_200_4b	PANH	200	4b	5.53	25	2							2018-02-02
Citrus reticulata x sinensis	Nova	PANH_200_5b	PANH	200	5b	5.53	13	1							2018-02-02
Citrus reticulata x sinensis	Nova	PANH_20_1b	PANH	20	1b	5.95	14	2		2		2			2018-02-02
Citrus reticulata x sinensis	Nova	PANH_20_2b	PANH	20	2b	5.95	20	3		1.5					2018-02-02
Citrus reticulata x sinensis	Nova	PANH_20_3b	PANH	20	3b	5.95	23	5							2018-02-02
Citrus reticulata x sinensis	Nova	PANH_20_4b	PANH	20	4b	5.95	20	2							2018-02-02
Citrus reticulata x sinensis	Nova	PANH_20_5b	PANH	20	5b	5.95	19	3							2018-02-02
Citrus reticulata x sinensis	Nova	PANH_2_1b	PANH	2	1b	5.98	12	4		1.5		1		2	2018-02-02
Citrus reticulata x sinensis	Nova	PANH_2_2b	PANH	2	2b	5.98	16	6		2				1	2018-02-02
Citrus reticulata x sinensis	Nova	PANH_2_3b	PANH	2	3b	5.98	19	6		1.33					2018-02-02
Citrus reticulata x sinensis	Nova	PANH_2_4b	PANH	2	4b	5.98	24	7		1					2018-02-02
Citrus reticulata x sinensis	Nova	PANH_2_5b	PANH	2	5b	5.98	22	8							2018-02-02
Citrus reticulata x sinensis	Nova	PACU_20000_1b	PACU	20000	1b	4.44	20	0		2.5		1		1	2018-02-02
Citrus reticulata x sinensis	Nova	PACU_20000_2b	PACU	20000	2b	4.44	13	0		2					2018-02-02
Citrus reticulata x sinensis	Nova	PACU_20000_3b	PACU	20000	3b	4.44	18	0							2018-02-02
Citrus reticulata x sinensis	Nova	PACU_20000_4b	PACU	20000	4b	4.44	29	0							2018-02-02
Citrus reticulata x sinensis	Nova	PACU_20000_5b	PACU	20000	5b	4.44	21	0							2018-02-02
Citrus reticulata x sinensis	Nova	PACU_2000_1b	PACU	2000	1b	1.53	21	0		1.5					2018-02-02
Citrus reticulata x sinensis	Nova	PACU_2000_2b	PACU	2000	2b	1.53	30	0							2018-02-02
Citrus reticulata x sinensis	Nova	PACU_2000_3b	PACU	2000	3b	1.53	26	0							2018-02-02
Citrus reticulata x sinensis	Nova	PACU_2000_4b	PACU	2000	4b	1.53	22	0							2018-02-02
Citrus reticulata x sinensis	Nova	PACU_2000_5b	PACU	2000	5b	1.53	38	0							2018-02-02
Citrus reticulata x sinensis	Nova	PACU_200_1b	PACU	200	1b	2.95	20	0		1.75				1	2018-02-02
Citrus reticulata x sinensis	Nova	PACU_200_2b	PACU	200	2b	2.95	18	0		2					2018-02-02
Citrus reticulata x sinensis	Nova	PACU_200_3b	PACU	200	3b	2.95	16	0		2.33					2018-02-02
Citrus reticulata x sinensis	Nova	PACU_200_4b	PACU	200	4b	2.95	19	1							2018-02-02
Citrus reticulata x sinensis	Nova	PACU_200_5b	PACU	200	5b	2.95	31	1							2018-02-02
Citrus reticulata x sinensis	Nova	PACU_20_1b	PACU	20	1b	3.46	15	1		2					2018-02-02
Citrus reticulata x sinensis	Nova	PACU_20_2b	PACU	20	2b	3.46	10	1							2018-02-02
Citrus reticulata x sinensis	Nova	PACU_20_3b	PACU	20	3b	3.46	13	2							2018-02-02
Citrus reticulata x sinensis	Nova	PACU_20_4b	PACU	20	4b	3.46	21	2							2018-02-02
Citrus reticulata x sinensis	Nova	PACU_20_5b	PACU	20	5b	3.46	8	2							2018-02-02
Citrus reticulata x sinensis	Nova	PACU_2_1b	PACU	2	1b	3.95	13	4				1			2018-02-02
Citrus reticulata x sinensis	Nova	PACU_2_2b	PACU	2	2b	3.95	10	3							2018-02-02
Citrus reticulata x sinensis	Nova	PACU_2_3b	PACU	2	3b	3.95	18	4							2018-02-02
Citrus reticulata x sinensis	Nova	PACU_2_4b	PACU	2	4b	3.95	9	3							2018-02-02
Citrus reticulata x sinensis	Nova	PACU_2_5b	PACU	2	5b	3.95	15	4							2018-02-02
Citrus reticulata x sinensis	Nova	Control 1a	BK	0	1b	5.4	10	3		3					2018-02-02
Citrus reticulata x sinensis	Nova	Control 2a	BK	0	2b	5.4	11	3		1					2018-02-02
Citrus reticulata x sinensis	Nova	Control 3a	BK	0	3b	5.4	14	4							2018-02-02
Citrus reticulata x sinensis	Nova	Control 4a	BK	0	4b	5.4	12	4							2018-02-02
Citrus reticulata x sinensis	Nova	Control 5a	BK	0	5b	5.4	17	5							2018-02-02
																SEGUNDA REPETICIÓN CLEMENULES
Citrus reticulata	Clemenules	PA_20000_1b	PA	20000	1b	4.23	51	0							2018-02-09
Citrus reticulata	Clemenules	PA_20000_2b	PA	20000	2b	4.23	53	0							2018-02-09
Citrus reticulata	Clemenules	PA_20000_3b	PA	20000	3b	4.23	83	0							2018-02-09
Citrus reticulata	Clemenules	PA_20000_4b	PA	20000	4b	4.23	42	0							2018-02-09
Citrus reticulata	Clemenules	PA_20000_5b	PA	20000	5b	4.23	37	0							2018-02-09
Citrus reticulata	Clemenules	PA_2000_1b	PA	2000	1b	3.79	57	0						1	2018-02-09
Citrus reticulata	Clemenules	PA_2000_2b	PA	2000	2b	3.79	83	0							2018-02-09
Citrus reticulata	Clemenules	PA_2000_3b	PA	2000	3b	3.79	62	0							2018-02-09
Citrus reticulata	Clemenules	PA_2000_4b	PA	2000	4b	3.79	85	0							2018-02-09
Citrus reticulata	Clemenules	PA_2000_5b	PA	2000	5b	3.79	71	0							2018-02-09
Citrus reticulata	Clemenules	PA_200_1b	PA	200	1b	3.69	11	1				2		1	2018-02-09
Citrus reticulata	Clemenules	PA_200_2b	PA	200	2b	3.69	29	0				1			2018-02-09
Citrus reticulata	Clemenules	PA_200_3b	PA	200	3b	3.69	20	0							2018-02-09
Citrus reticulata	Clemenules	PA_200_4b	PA	200	4b	3.69	13	0							2018-02-09
Citrus reticulata	Clemenules	PA_200_5b	PA	200	5b	3.69	37	1							2018-02-09
Citrus reticulata	Clemenules	PA_20_1b	PA	20	1b	3.72	14	2		1		1		1.5	2018-02-09
Citrus reticulata	Clemenules	PA_20_2b	PA	20	2b	3.72	22	4							2018-02-09
Citrus reticulata	Clemenules	PA_20_3b	PA	20	3b	3.72	16	2							2018-02-09
Citrus reticulata	Clemenules	PA_20_4b	PA	20	4b	3.72	19	4							2018-02-09
Citrus reticulata	Clemenules	PA_20_5b	PA	20	5b	3.72	10	1							2018-02-09
Citrus reticulata	Clemenules	PA_2_1b	PA	2	1b	4.32	13	2						1	2018-02-09
Citrus reticulata	Clemenules	PA_2_2b	PA	2	2b	4.32	22	4							2018-02-09
Citrus reticulata	Clemenules	PA_2_3b	PA	2	3b	4.32	35	10							2018-02-09
Citrus reticulata	Clemenules	PA_2_4b	PA	2	4b	4.32	16	5							2018-02-09
Citrus reticulata	Clemenules	PA_2_5b	PA	2	5b	4.32	8	4							2018-02-09
Citrus reticulata	Clemenules	PAWG_20000_1b	PAWG	20000	1b	5.11	31	0						1.25	2018-02-09
Citrus reticulata	Clemenules	PAWG_20000_2b	PAWG	20000	2b	5.11	33	0						1	2018-02-09
Citrus reticulata	Clemenules	PAWG_20000_3b	PAWG	20000	3b	5.11	49	0							2018-02-09
Citrus reticulata	Clemenules	PAWG_20000_4b	PAWG	20000	4b	5.11	92	0							2018-02-09
Citrus reticulata	Clemenules	PAWG_20000_5b	PAWG	20000	5b	5.11	71	1							2018-02-09
Citrus reticulata	Clemenules	PAWG_2000_1b	PAWG	2000	1b	4.49	14	0				1		1	2018-02-09
Citrus reticulata	Clemenules	PAWG_2000_2b	PAWG	2000	2b	4.49	10	0							2018-02-09
Citrus reticulata	Clemenules	PAWG_2000_3b	PAWG	2000	3b	4.49	12	0							2018-02-09
Citrus reticulata	Clemenules	PAWG_2000_4b	PAWG	2000	4b	4.49	11	0							2018-02-09
Citrus reticulata	Clemenules	PAWG_2000_5b	PAWG	2000	5b	4.49	18	0							2018-02-09
Citrus reticulata	Clemenules	PAWG_200_1b	PAWG	200	1b	3.76	43	3		1		1		2	2018-02-09
Citrus reticulata	Clemenules	PAWG_200_2b	PAWG	200	2b	3.76	13	1						1	2018-02-09
Citrus reticulata	Clemenules	PAWG_200_3b	PAWG	200	3b	3.76	12	0							2018-02-09
Citrus reticulata	Clemenules	PAWG_200_4b	PAWG	200	4b	3.76	23	2							2018-02-09
Citrus reticulata	Clemenules	PAWG_200_5b	PAWG	200	5b	3.76	33	0							2018-02-09
Citrus reticulata	Clemenules	PAWG_20_1b	PAWG	20	1b	3.7	18	2				1.5		1	2018-02-09
Citrus reticulata	Clemenules	PAWG_20_2b	PAWG	20	2b	3.7	22	4						1	2018-02-09
Citrus reticulata	Clemenules	PAWG_20_3b	PAWG	20	3b	3.7	23	4							2018-02-09
Citrus reticulata	Clemenules	PAWG_20_4b	PAWG	20	4b	3.7	15	1							2018-02-09
Citrus reticulata	Clemenules	PAWG_20_5b	PAWG	20	5b	3.7	24	3							2018-02-09
Citrus reticulata	Clemenules	PAWG_2_1b	PAWG	2	1b	4.21	24	1		1				1.25	2018-02-09
Citrus reticulata	Clemenules	PAWG_2_2b	PAWG	2	2b	4.21	32	5		3				2.5	2018-02-09
Citrus reticulata	Clemenules	PAWG_2_3b	PAWG	2	3b	4.21	19	10						1	2018-02-09
Citrus reticulata	Clemenules	PAWG_2_4b	PAWG	2	4b	4.21	22	8						2	2018-02-09
Citrus reticulata	Clemenules	PAWG_2_5b	PAWG	2	5b	4.21	23	5							2018-02-09
Citrus reticulata	Clemenules	PANH_20000_1b	PANH	20000	1b	4.1	61	1		1.67		2.67			2018-02-09
Citrus reticulata	Clemenules	PANH_20000_2b	PANH	20000	2b	4.1	35	0		1.25		1.5			2018-02-09
Citrus reticulata	Clemenules	PANH_20000_3b	PANH	20000	3b	4.1	27	0		1					2018-02-09
Citrus reticulata	Clemenules	PANH_20000_4b	PANH	20000	4b	4.1	16	0		2					2018-02-09
Citrus reticulata	Clemenules	PANH_20000_5b	PANH	20000	5b	4.1	39	2							2018-02-09
Citrus reticulata	Clemenules	PANH_2000_1b	PANH	2000	1b	4.28	5	0		1.17		1.25			2018-02-09
Citrus reticulata	Clemenules	PANH_2000_2b	PANH	2000	2b	4.28	9	0		1		1.5			2018-02-09
Citrus reticulata	Clemenules	PANH_2000_3b	PANH	2000	3b	4.28	11	0							2018-02-09
Citrus reticulata	Clemenules	PANH_2000_4b	PANH	2000	4b	4.28	28	0							2018-02-09
Citrus reticulata	Clemenules	PANH_2000_5b	PANH	2000	5b	4.28	29	0							2018-02-09
Citrus reticulata	Clemenules	PANH_200_1b	PANH	200	1b	5.53	5	0		1.5		1			2018-02-09
Citrus reticulata	Clemenules	PANH_200_2b	PANH	200	2b	5.53	13	1		1.5		1			2018-02-09
Citrus reticulata	Clemenules	PANH_200_3b	PANH	200	3b	5.53	24	9							2018-02-09
Citrus reticulata	Clemenules	PANH_200_4b	PANH	200	4b	5.53	10	6							2018-02-09
Citrus reticulata	Clemenules	PANH_200_5b	PANH	200	5b	5.53	12	7							2018-02-09
Citrus reticulata	Clemenules	PANH_20_1b	PANH	20	1b	5.95	11	3		1.5		1.5			2018-02-09
Citrus reticulata	Clemenules	PANH_20_2b	PANH	20	2b	5.95	5	0		1		1.25			2018-02-09
Citrus reticulata	Clemenules	PANH_20_3b	PANH	20	3b	5.95	32	22		2					2018-02-09
Citrus reticulata	Clemenules	PANH_20_4b	PANH	20	4b	5.95	17	7							2018-02-09
Citrus reticulata	Clemenules	PANH_20_5b	PANH	20	5b	5.95	7	6							2018-02-09
Citrus reticulata	Clemenules	PANH_2_1b	PANH	2	1b	5.98	26	9		1.5		1.5			2018-02-09
Citrus reticulata	Clemenules	PANH_2_2b	PANH	2	2b	5.98	18	8							2018-02-09
Citrus reticulata	Clemenules	PANH_2_3b	PANH	2	3b	5.98	10	5							2018-02-09
Citrus reticulata	Clemenules	PANH_2_4b	PANH	2	4b	5.98	11	7							2018-02-09
Citrus reticulata	Clemenules	PANH_2_5b	PANH	2	5b	5.98	6	4							2018-02-09
Citrus reticulata	Clemenules	PACU_20000_1b	PACU	20000	1b	4.44	28	0		2		3			2018-02-09
Citrus reticulata	Clemenules	PACU_20000_2b	PACU	20000	2b	4.44	53	0		1		1			2018-02-09
Citrus reticulata	Clemenules	PACU_20000_3b	PACU	20000	3b	4.44	73	1							2018-02-09
Citrus reticulata	Clemenules	PACU_20000_4b	PACU	20000	4b	4.44	27	0							2018-02-09
Citrus reticulata	Clemenules	PACU_20000_5b	PACU	20000	5b	4.44	35	0							2018-02-09
Citrus reticulata	Clemenules	PACU_2000_1b	PACU	2000	1b	1.53	87	0							2018-02-09
Citrus reticulata	Clemenules	PACU_2000_2b	PACU	2000	2b	1.53	42	0							2018-02-09
Citrus reticulata	Clemenules	PACU_2000_3b	PACU	2000	3b	1.53	113	0							2018-02-09
Citrus reticulata	Clemenules	PACU_2000_4b	PACU	2000	4b	1.53	54	0							2018-02-09
Citrus reticulata	Clemenules	PACU_2000_5b	PACU	2000	5b	1.53	52	0							2018-02-09
Citrus reticulata	Clemenules	PACU_200_1b	PACU	200	1b	2.95	11	3				2			2018-02-09
Citrus reticulata	Clemenules	PACU_200_2b	PACU	200	2b	2.95	32	0				1			2018-02-09
Citrus reticulata	Clemenules	PACU_200_3b	PACU	200	3b	2.95	52	0							2018-02-09
Citrus reticulata	Clemenules	PACU_200_4b	PACU	200	4b	2.95	22	2							2018-02-09
Citrus reticulata	Clemenules	PACU_200_5b	PACU	200	5b	2.95	7	0							2018-02-09
Citrus reticulata	Clemenules	PACU_20_1b	PACU	20	1b	3.46	6	1				1			2018-02-09
Citrus reticulata	Clemenules	PACU_20_2b	PACU	20	2b	3.46	10	2				1			2018-02-09
Citrus reticulata	Clemenules	PACU_20_3b	PACU	20	3b	3.46	22	12							2018-02-09
Citrus reticulata	Clemenules	PACU_20_4b	PACU	20	4b	3.46	27	17							2018-02-09
Citrus reticulata	Clemenules	PACU_20_5b	PACU	20	5b	3.46	7	6							2018-02-09
Citrus reticulata	Clemenules	PACU_2_1b	PACU	2	1b	3.95	13	5							2018-02-09
Citrus reticulata	Clemenules	PACU_2_2b	PACU	2	2b	3.95	18	8							2018-02-09
Citrus reticulata	Clemenules	PACU_2_3b	PACU	2	3b	3.95	5	3							2018-02-09
Citrus reticulata	Clemenules	PACU_2_4b	PACU	2	4b	3.95	18	10							2018-02-09
Citrus reticulata	Clemenules	PACU_2_5b	PACU	2	5b	3.95	8	5							2018-02-09
Citrus reticulata	Clemenules	Control 1a	BK	0	1b	5.4	6	4							2018-02-09
Citrus reticulata	Clemenules	Control 2a	BK	0	2b	5.4	8	4							2018-02-09
Citrus reticulata	Clemenules	Control 3a	BK	0	3b	5.4	9	6							2018-02-09
Citrus reticulata	Clemenules	Control 4a	BK	0	4b	5.4	20	12							2018-02-09
Citrus reticulata	Clemenules	Control 5a	BK	0	5b	5.4	8	5							2018-02-09
																TERCERA REPETICIÓN NOVA
Citrus reticulata x sinensis	Nova	PA_20000_1c	PA	20000	1c	4.23	10	0							2018-02-22
Citrus reticulata x sinensis	Nova	PA_20000_2c	PA	20000	2c	4.23	16	0							2018-02-22
Citrus reticulata x sinensis	Nova	PA_20000_3c	PA	20000	3c	4.23	34	0							2018-02-22
Citrus reticulata x sinensis	Nova	PA_20000_4c	PA	20000	4c	4.23	27	0							2018-02-22
Citrus reticulata x sinensis	Nova	PA_20000_5c	PA	20000	5c	4.23	38	0							2018-02-22
Citrus reticulata x sinensis	Nova	PA_2000_1c	PA	2000	1c	3.79	15	0							2018-02-22
Citrus reticulata x sinensis	Nova	PA_2000_2c	PA	2000	2c	3.79	42	0							2018-02-22
Citrus reticulata x sinensis	Nova	PA_2000_3c	PA	2000	3c	3.79	14	0							2018-02-22
Citrus reticulata x sinensis	Nova	PA_2000_4c	PA	2000	4c	3.79	35	0							2018-02-22
Citrus reticulata x sinensis	Nova	PA_2000_5c	PA	2000	5c	3.79	13	0							2018-02-22
Citrus reticulata x sinensis	Nova	PA_200_1c	PA	200	1c	3.69	18	0							2018-02-22
Citrus reticulata x sinensis	Nova	PA_200_2c	PA	200	2c	3.69	10	0							2018-02-22
Citrus reticulata x sinensis	Nova	PA_200_3c	PA	200	3c	3.69	32	1							2018-02-22
Citrus reticulata x sinensis	Nova	PA_200_4c	PA	200	4c	3.69	12	0							2018-02-22
Citrus reticulata x sinensis	Nova	PA_200_5c	PA	200	5c	3.69	21	0							2018-02-22
Citrus reticulata x sinensis	Nova	PA_20_1c	PA	20	1c	3.72	10	1							2018-02-22
Citrus reticulata x sinensis	Nova	PA_20_2c	PA	20	2c	3.72	18	2							2018-02-22
Citrus reticulata x sinensis	Nova	PA_20_3c	PA	20	3c	3.72	22	3							2018-02-22
Citrus reticulata x sinensis	Nova	PA_20_4c	PA	20	4c	3.72	7	0							2018-02-22
Citrus reticulata x sinensis	Nova	PA_20_5c	PA	20	5c	3.72	24	3							2018-02-22
Citrus reticulata x sinensis	Nova	PA_2_1c	PA	2	1c	4.32	40	5							2018-02-22
Citrus reticulata x sinensis	Nova	PA_2_2c	PA	2	2c	4.32	73	6							2018-02-22
Citrus reticulata x sinensis	Nova	PA_2_3c	PA	2	3c	4.32	62	8							2018-02-22
Citrus reticulata x sinensis	Nova	PA_2_4c	PA	2	4c	4.32	44	19							2018-02-22
Citrus reticulata x sinensis	Nova	PA_2_5c	PA	2	5c	4.32	32	8							2018-02-22
Citrus reticulata x sinensis	Nova	PAWG_20000_1c	PAWG	20000	1c	5.11	7	0							2018-02-22
Citrus reticulata x sinensis	Nova	PAWG_20000_2c	PAWG	20000	2c	5.11	12	0							2018-02-22
Citrus reticulata x sinensis	Nova	PAWG_20000_3c	PAWG	20000	3c	5.11	13	0							2018-02-22
Citrus reticulata x sinensis	Nova	PAWG_20000_4c	PAWG	20000	4c	5.11	12	0							2018-02-22
Citrus reticulata x sinensis	Nova	PAWG_20000_5c	PAWG	20000	5c	5.11	10	0							2018-02-22
Citrus reticulata x sinensis	Nova	PAWG_2000_1c	PAWG	2000	1c	4.49	23	0							2018-02-22
Citrus reticulata x sinensis	Nova	PAWG_2000_2c	PAWG	2000	2c	4.49	17	0							2018-02-22
Citrus reticulata x sinensis	Nova	PAWG_2000_3c	PAWG	2000	3c	4.49	33	0							2018-02-22
Citrus reticulata x sinensis	Nova	PAWG_2000_4c	PAWG	2000	4c	4.49	20	0							2018-02-22
Citrus reticulata x sinensis	Nova	PAWG_2000_5c	PAWG	2000	5c	4.49	24	0							2018-02-22
Citrus reticulata x sinensis	Nova	PAWG_200_1c	PAWG	200	1c	3.76	16	0							2018-02-22
Citrus reticulata x sinensis	Nova	PAWG_200_2c	PAWG	200	2c	3.76	21	0							2018-02-22
Citrus reticulata x sinensis	Nova	PAWG_200_3c	PAWG	200	3c	3.76	30	0							2018-02-22
Citrus reticulata x sinensis	Nova	PAWG_200_4c	PAWG	200	4c	3.76	17	1							2018-02-22
Citrus reticulata x sinensis	Nova	PAWG_200_5c	PAWG	200	5c	3.76	31	1							2018-02-22
Citrus reticulata x sinensis	Nova	PAWG_20_1c	PAWG	20	1c	3.7	28	3							2018-02-22
Citrus reticulata x sinensis	Nova	PAWG_20_2c	PAWG	20	2c	3.7	21	1							2018-02-22
Citrus reticulata x sinensis	Nova	PAWG_20_3c	PAWG	20	3c	3.7	18	1							2018-02-22
Citrus reticulata x sinensis	Nova	PAWG_20_4c	PAWG	20	4c	3.7	24	3							2018-02-22
Citrus reticulata x sinensis	Nova	PAWG_20_5c	PAWG	20	5c	3.7	38	5							2018-02-22
Citrus reticulata x sinensis	Nova	PAWG_2_1c	PAWG	2	1c	4.21	25	5							2018-02-22
Citrus reticulata x sinensis	Nova	PAWG_2_2c	PAWG	2	2c	4.21	23	2							2018-02-22
Citrus reticulata x sinensis	Nova	PAWG_2_3c	PAWG	2	3c	4.21	32	4							2018-02-22
Citrus reticulata x sinensis	Nova	PAWG_2_4c	PAWG	2	4c	4.21	37	5							2018-02-22
Citrus reticulata x sinensis	Nova	PAWG_2_5c	PAWG	2	5c	4.21	26	3							2018-02-22
Citrus reticulata x sinensis	Nova	PANH_20000_1c	PANH	20000	1c	4.1	24	0							2018-02-22
Citrus reticulata x sinensis	Nova	PANH_20000_2c	PANH	20000	2c	4.1	17	0							2018-02-22
Citrus reticulata x sinensis	Nova	PANH_20000_3c	PANH	20000	3c	4.1	12	0							2018-02-22
Citrus reticulata x sinensis	Nova	PANH_20000_4c	PANH	20000	4c	4.1	32	0							2018-02-22
Citrus reticulata x sinensis	Nova	PANH_20000_5c	PANH	20000	5c	4.1	31	0							2018-02-22
Citrus reticulata x sinensis	Nova	PANH_2000_1c	PANH	2000	1c	4.28	10	0							2018-02-22
Citrus reticulata x sinensis	Nova	PANH_2000_2c	PANH	2000	2c	4.28	8	0							2018-02-22
Citrus reticulata x sinensis	Nova	PANH_2000_3c	PANH	2000	3c	4.28	33	0							2018-02-22
Citrus reticulata x sinensis	Nova	PANH_2000_4c	PANH	2000	4c	4.28	49	0							2018-02-22
Citrus reticulata x sinensis	Nova	PANH_2000_5c	PANH	2000	5c	4.28	17	0							2018-02-22
Citrus reticulata x sinensis	Nova	PANH_200_1c	PANH	200	1c	5.53	18	0							2018-02-22
Citrus reticulata x sinensis	Nova	PANH_200_2c	PANH	200	2c	5.53	30	2							2018-02-22
Citrus reticulata x sinensis	Nova	PANH_200_3c	PANH	200	3c	5.53	29	0							2018-02-22
Citrus reticulata x sinensis	Nova	PANH_200_4c	PANH	200	4c	5.53	51	7							2018-02-22
Citrus reticulata x sinensis	Nova	PANH_200_5c	PANH	200	5c	5.53	23	7							2018-02-22
Citrus reticulata x sinensis	Nova	PANH_20_1c	PANH	20	1c	5.95	20	4							2018-02-22
Citrus reticulata x sinensis	Nova	PANH_20_2c	PANH	20	2c	5.95	32	2							2018-02-22
Citrus reticulata x sinensis	Nova	PANH_20_3c	PANH	20	3c	5.95	16	2							2018-02-22
Citrus reticulata x sinensis	Nova	PANH_20_4c	PANH	20	4c	5.95	29	2							2018-02-22
Citrus reticulata x sinensis	Nova	PANH_20_5c	PANH	20	5c	5.95	39	5							2018-02-22
Citrus reticulata x sinensis	Nova	PANH_2_1c	PANH	2	1c	5.98	18	2							2018-02-22
Citrus reticulata x sinensis	Nova	PANH_2_2c	PANH	2	2c	5.98	27	8							2018-02-22
Citrus reticulata x sinensis	Nova	PANH_2_3c	PANH	2	3c	5.98	23	4							2018-02-22
Citrus reticulata x sinensis	Nova	PANH_2_4c	PANH	2	4c	5.98	52	10							2018-02-22
Citrus reticulata x sinensis	Nova	PANH_2_5c	PANH	2	5c	5.98									2018-02-22
Citrus reticulata x sinensis	Nova	PACU_20000_1c	PACU	20000	1c	4.44	47	0							2018-02-22
Citrus reticulata x sinensis	Nova	PACU_20000_2c	PACU	20000	2c	4.44	11	0							2018-02-22
Citrus reticulata x sinensis	Nova	PACU_20000_3c	PACU	20000	3c	4.44	2	0							2018-02-22
Citrus reticulata x sinensis	Nova	PACU_20000_4c	PACU	20000	4c	4.44	54	0							2018-02-22
Citrus reticulata x sinensis	Nova	PACU_20000_5c	PACU	20000	5c	4.44	31	0							2018-02-22
Citrus reticulata x sinensis	Nova	PACU_2000_1c	PACU	2000	1c	1.53	23	0							2018-02-22
Citrus reticulata x sinensis	Nova	PACU_2000_2c	PACU	2000	2c	1.53	25	0							2018-02-22
Citrus reticulata x sinensis	Nova	PACU_2000_3c	PACU	2000	3c	1.53	12	0							2018-02-22
Citrus reticulata x sinensis	Nova	PACU_2000_4c	PACU	2000	4c	1.53	6	0							2018-02-22
Citrus reticulata x sinensis	Nova	PACU_2000_5c	PACU	2000	5c	1.53	9	0							2018-02-22
Citrus reticulata x sinensis	Nova	PACU_200_1c	PACU	200	1c	2.95	22	0							2018-02-22
Citrus reticulata x sinensis	Nova	PACU_200_2c	PACU	200	2c	2.95	12	1							2018-02-22
Citrus reticulata x sinensis	Nova	PACU_200_3c	PACU	200	3c	2.95	17	0							2018-02-22
Citrus reticulata x sinensis	Nova	PACU_200_4c	PACU	200	4c	2.95	11	0							2018-02-22
Citrus reticulata x sinensis	Nova	PACU_200_5c	PACU	200	5c	2.95	5	0							2018-02-22
Citrus reticulata x sinensis	Nova	PACU_20_1c	PACU	20	1c	3.46	13	2							2018-02-22
Citrus reticulata x sinensis	Nova	PACU_20_2c	PACU	20	2c	3.46	7	1							2018-02-22
Citrus reticulata x sinensis	Nova	PACU_20_3c	PACU	20	3c	3.46	18	2							2018-02-22
Citrus reticulata x sinensis	Nova	PACU_20_4c	PACU	20	4c	3.46	9	1							2018-02-22
Citrus reticulata x sinensis	Nova	PACU_20_5c	PACU	20	5c	3.46	31	2							2018-02-22
Citrus reticulata x sinensis	Nova	PACU_2_1c	PACU	2	1c	3.95	19	5							2018-02-22
Citrus reticulata x sinensis	Nova	PACU_2_2c	PACU	2	2c	3.95	12	2							2018-02-22
Citrus reticulata x sinensis	Nova	PACU_2_3c	PACU	2	3c	3.95	21	3							2018-02-22
Citrus reticulata x sinensis	Nova	PACU_2_4c	PACU	2	4c	3.95	21	7							2018-02-22
Citrus reticulata x sinensis	Nova	PACU_2_5c	PACU	2	5c	3.95	20	3							2018-02-22
Citrus reticulata x sinensis	Nova	Control 1a	BK	0	1c	5.4	46	14							2018-02-22
Citrus reticulata x sinensis	Nova	Control 2a	BK	0	2c	5.4	35	11							2018-02-22
Citrus reticulata x sinensis	Nova	Control 3a	BK	0	3c	5.4	59	16							2018-02-22
Citrus reticulata x sinensis	Nova	Control 4a	BK	0	4c	5.4	23	7							2018-02-22
Citrus reticulata x sinensis	Nova	Control 5a	BK	0	5c	5.4	37	12							2018-02-22
																TERCERA REPETICIÓN CLEMENULES
Citrus reticulata	Clemenules	PA_20000_1c	PA	20000	1c	4.23	24	0							2018-03-07
Citrus reticulata	Clemenules	PA_20000_2c	PA	20000	2c	4.23	44	0							2018-03-07
Citrus reticulata	Clemenules	PA_20000_3c	PA	20000	3c	4.23	30	0							2018-03-07
Citrus reticulata	Clemenules	PA_20000_4c	PA	20000	4c	4.23	37	0							2018-03-07
Citrus reticulata	Clemenules	PA_20000_5c	PA	20000	5c	4.23	62	0							2018-03-07
Citrus reticulata	Clemenules	PA_2000_1c	PA	2000	1c	3.79	17	0							2018-03-07
Citrus reticulata	Clemenules	PA_2000_2c	PA	2000	2c	3.79	82	0							2018-03-07
Citrus reticulata	Clemenules	PA_2000_3c	PA	2000	3c	3.79	30	0							2018-03-07
Citrus reticulata	Clemenules	PA_2000_4c	PA	2000	4c	3.79	63	0							2018-03-07
Citrus reticulata	Clemenules	PA_2000_5c	PA	2000	5c	3.79	20	0							2018-03-07
Citrus reticulata	Clemenules	PA_200_1c	PA	200	1c	3.69	19	0							2018-03-07
Citrus reticulata	Clemenules	PA_200_2c	PA	200	2c	3.69	26	1							2018-03-07
Citrus reticulata	Clemenules	PA_200_3c	PA	200	3c	3.69	43	0							2018-03-07
Citrus reticulata	Clemenules	PA_200_4c	PA	200	4c	3.69	28	0							2018-03-07
Citrus reticulata	Clemenules	PA_200_5c	PA	200	5c	3.69	35	0							2018-03-07
Citrus reticulata	Clemenules	PA_20_1c	PA	20	1c	3.72	9	2							2018-03-07
Citrus reticulata	Clemenules	PA_20_2c	PA	20	2c	3.72	15	3							2018-03-07
Citrus reticulata	Clemenules	PA_20_3c	PA	20	3c	3.72	10	2							2018-03-07
Citrus reticulata	Clemenules	PA_20_4c	PA	20	4c	3.72	26	6							2018-03-07
Citrus reticulata	Clemenules	PA_20_5c	PA	20	5c	3.72	30	7							2018-03-07
Citrus reticulata	Clemenules	PA_2_1c	PA	2	1c	4.32	22	6							2018-03-07
Citrus reticulata	Clemenules	PA_2_2c	PA	2	2c	4.32	20	9							2018-03-07
Citrus reticulata	Clemenules	PA_2_3c	PA	2	3c	4.32	31	11							2018-03-07
Citrus reticulata	Clemenules	PA_2_4c	PA	2	4c	4.32	19	7							2018-03-07
Citrus reticulata	Clemenules	PA_2_5c	PA	2	5c	4.32	22	8							2018-03-07
Citrus reticulata	Clemenules	PAWG_20000_1c	PAWG	20000	1c	5.11	21	0							2018-03-07
Citrus reticulata	Clemenules	PAWG_20000_2c	PAWG	20000	2c	5.11	32	0							2018-03-07
Citrus reticulata	Clemenules	PAWG_20000_3c	PAWG	20000	3c	5.11	25	0							2018-03-07
Citrus reticulata	Clemenules	PAWG_20000_4c	PAWG	20000	4c	5.11	29	0							2018-03-07
Citrus reticulata	Clemenules	PAWG_20000_5c	PAWG	20000	5c	5.11	17	0							2018-03-07
Citrus reticulata	Clemenules	PAWG_2000_1c	PAWG	2000	1c	4.49	16	0							2018-03-07
Citrus reticulata	Clemenules	PAWG_2000_2c	PAWG	2000	2c	4.49	23	0							2018-03-07
Citrus reticulata	Clemenules	PAWG_2000_3c	PAWG	2000	3c	4.49	13	0							2018-03-07
Citrus reticulata	Clemenules	PAWG_2000_4c	PAWG	2000	4c	4.49	30	0							2018-03-07
Citrus reticulata	Clemenules	PAWG_2000_5c	PAWG	2000	5c	4.49	32	2							2018-03-07
Citrus reticulata	Clemenules	PAWG_200_1c	PAWG	200	1c	3.76	38	12							2018-03-07
Citrus reticulata	Clemenules	PAWG_200_2c	PAWG	200	2c	3.76	46	18							2018-03-07
Citrus reticulata	Clemenules	PAWG_200_3c	PAWG	200	3c	3.76	25	10							2018-03-07
Citrus reticulata	Clemenules	PAWG_200_4c	PAWG	200	4c	3.76	15	3							2018-03-07
Citrus reticulata	Clemenules	PAWG_200_5c	PAWG	200	5c	3.76	26	9							2018-03-07
Citrus reticulata	Clemenules	PAWG_20_1c	PAWG	20	1c	3.7	32	20							2018-03-07
Citrus reticulata	Clemenules	PAWG_20_2c	PAWG	20	2c	3.7	19	8							2018-03-07
Citrus reticulata	Clemenules	PAWG_20_3c	PAWG	20	3c	3.7	22	9							2018-03-07
Citrus reticulata	Clemenules	PAWG_20_4c	PAWG	20	4c	3.7	44	16							2018-03-07
Citrus reticulata	Clemenules	PAWG_20_5c	PAWG	20	5c	3.7	20	8							2018-03-07
Citrus reticulata	Clemenules	PAWG_2_1c	PAWG	2	1c	4.21	25	11							2018-03-07
Citrus reticulata	Clemenules	PAWG_2_2c	PAWG	2	2c	4.21	30	13							2018-03-07
Citrus reticulata	Clemenules	PAWG_2_3c	PAWG	2	3c	4.21	24	11							2018-03-07
Citrus reticulata	Clemenules	PAWG_2_4c	PAWG	2	4c	4.21	17	8							2018-03-07
Citrus reticulata	Clemenules	PAWG_2_5c	PAWG	2	5c	4.21	28	12							2018-03-07
Citrus reticulata	Clemenules	PANH_20000_1c	PANH	20000	1c	4.1	39	0							2018-03-07
Citrus reticulata	Clemenules	PANH_20000_2c	PANH	20000	2c	4.1	8	0							2018-03-07
Citrus reticulata	Clemenules	PANH_20000_3c	PANH	20000	3c	4.1	26	0							2018-03-07
Citrus reticulata	Clemenules	PANH_20000_4c	PANH	20000	4c	4.1	33	0							2018-03-07
Citrus reticulata	Clemenules	PANH_20000_5c	PANH	20000	5c	4.1	16	0							2018-03-07
Citrus reticulata	Clemenules	PANH_2000_1c	PANH	2000	1c	4.28	36	1							2018-03-07
Citrus reticulata	Clemenules	PANH_2000_2c	PANH	2000	2c	4.28	28	0							2018-03-07
Citrus reticulata	Clemenules	PANH_2000_3c	PANH	2000	3c	4.28	34	0							2018-03-07
Citrus reticulata	Clemenules	PANH_2000_4c	PANH	2000	4c	4.28	34	0							2018-03-07
Citrus reticulata	Clemenules	PANH_2000_5c	PANH	2000	5c	4.28	36	1							2018-03-07
Citrus reticulata	Clemenules	PANH_200_1c	PANH	200	1c	5.53	15	0							2018-03-07
Citrus reticulata	Clemenules	PANH_200_2c	PANH	200	2c	5.53	17	3							2018-03-07
Citrus reticulata	Clemenules	PANH_200_3c	PANH	200	3c	5.53	12	2							2018-03-07
Citrus reticulata	Clemenules	PANH_200_4c	PANH	200	4c	5.53	15	1							2018-03-07
Citrus reticulata	Clemenules	PANH_200_5c	PANH	200	5c	5.53	10	3							2018-03-07
Citrus reticulata	Clemenules	PANH_20_1c	PANH	20	1c	5.95	18	5							2018-03-07
Citrus reticulata	Clemenules	PANH_20_2c	PANH	20	2c	5.95	17	5							2018-03-07
Citrus reticulata	Clemenules	PANH_20_3c	PANH	20	3c	5.95	25	5							2018-03-07
Citrus reticulata	Clemenules	PANH_20_4c	PANH	20	4c	5.95	13	4							2018-03-07
Citrus reticulata	Clemenules	PANH_20_5c	PANH	20	5c	5.95									2018-03-07
Citrus reticulata	Clemenules	PANH_2_1c	PANH	2	1c	5.98	27	8							2018-03-07
Citrus reticulata	Clemenules	PANH_2_2c	PANH	2	2c	5.98	20	6							2018-03-07
Citrus reticulata	Clemenules	PANH_2_3c	PANH	2	3c	5.98	20	7							2018-03-07
Citrus reticulata	Clemenules	PANH_2_4c	PANH	2	4c	5.98	18	5							2018-03-07
Citrus reticulata	Clemenules	PANH_2_5c	PANH	2	5c	5.98	22	7							2018-03-07
Citrus reticulata	Clemenules	PACU_20000_1c	PACU	20000	1c	4.44	44	0							2018-03-07
Citrus reticulata	Clemenules	PACU_20000_2c	PACU	20000	2c	4.44	36	0							2018-03-07
Citrus reticulata	Clemenules	PACU_20000_3c	PACU	20000	3c	4.44	33	0							2018-03-07
Citrus reticulata	Clemenules	PACU_20000_4c	PACU	20000	4c	4.44	30	0							2018-03-07
Citrus reticulata	Clemenules	PACU_20000_5c	PACU	20000	5c	4.44	15	0							2018-03-07
Citrus reticulata	Clemenules	PACU_2000_1c	PACU	2000	1c	1.53	21	0							2018-03-07
Citrus reticulata	Clemenules	PACU_2000_2c	PACU	2000	2c	1.53	17	0							2018-03-07
Citrus reticulata	Clemenules	PACU_2000_3c	PACU	2000	3c	1.53	19	0							2018-03-07
Citrus reticulata	Clemenules	PACU_2000_4c	PACU	2000	4c	1.53	29	0							2018-03-07
Citrus reticulata	Clemenules	PACU_2000_5c	PACU	2000	5c	1.53	38	0							2018-03-07
Citrus reticulata	Clemenules	PACU_200_1c	PACU	200	1c	2.95	10	0							2018-03-07
Citrus reticulata	Clemenules	PACU_200_2c	PACU	200	2c	2.95	23	1							2018-03-07
Citrus reticulata	Clemenules	PACU_200_3c	PACU	200	3c	2.95	25	0							2018-03-07
Citrus reticulata	Clemenules	PACU_200_4c	PACU	200	4c	2.95	37	1							2018-03-07
Citrus reticulata	Clemenules	PACU_200_5c	PACU	200	5c	2.95	22	1							2018-03-07
Citrus reticulata	Clemenules	PACU_20_1c	PACU	20	1c	3.46	8	1							2018-03-07
Citrus reticulata	Clemenules	PACU_20_2c	PACU	20	2c	3.46	16	5							2018-03-07
Citrus reticulata	Clemenules	PACU_20_3c	PACU	20	3c	3.46	31	10							2018-03-07
Citrus reticulata	Clemenules	PACU_20_4c	PACU	20	4c	3.46	21	7							2018-03-07
Citrus reticulata	Clemenules	PACU_20_5c	PACU	20	5c	3.46	15	6							2018-03-07
Citrus reticulata	Clemenules	PACU_2_1c	PACU	2	1c	3.95	11	6							2018-03-07
Citrus reticulata	Clemenules	PACU_2_2c	PACU	2	2c	3.95	22	8							2018-03-07
Citrus reticulata	Clemenules	PACU_2_3c	PACU	2	3c	3.95	31	7							2018-03-07
Citrus reticulata	Clemenules	PACU_2_4c	PACU	2	4c	3.95	20	7							2018-03-07
Citrus reticulata	Clemenules	PACU_2_5c	PACU	2	5c	3.95	18	6							2018-03-07
Citrus reticulata	Clemenules	Control 1a	BK	0	1c	5.4	10	4							2018-03-07
Citrus reticulata	Clemenules	Control 2a	BK	0	2c	5.4	12	5							2018-03-07
Citrus reticulata	Clemenules	Control 3a	BK	0	3c	5.4	24	11							2018-03-07
Citrus reticulata	Clemenules	Control 4a	BK	0	4c	5.4	78	46							2018-03-07
Citrus reticulata	Clemenules	Control 5a	BK	0	5c	5.4	25	14							2018-03-07

## Sheet: LEGEND
Species	Species whose flowers was used in the trial
Variety	Number of the variety of each species
Plate	Identification code of each plate
Treatment	Products used: PAP or PA (inorganic sulfur), PAWG (water dispersble grnulr sulfur), PANH (ammonium sulfate), PACU (copper sulfate), BK (positive control)
Concentration	Concentration of the product
Repetition	Repetition number
Ph	pH of the medium
Npollen	Total number of pollen grains
Ngerminated	Number of germinated pollen grains
Length24	Length of the pollen tube after 24h
Length48	Length of the pollen tube after 48h
Length72	Length of the pollen tube after 72h
Date	date on which the tests were carried out
Observations	most relevant observations
